# Supplementary material for: Solid phase crystallization of amorphous silicon at the two-dimensional limit
Source: Royal Society of Chemistry journal article supplement (doi:10.1039/d2na00546h), 2022-12-06
Supplement: d2na00546h1.pdf [file d2na00546h1.pdf]

## Supplementary Information

### **Solid Phase Crystallization of Amorphous Silicon at the Two-Dimensional Limit**

Daya S. Dhungana<sup>1</sup>, Eleonora Bonaventura<sup>1</sup>, Christian Martella<sup>1</sup>, Carlo Grazianetti<sup>1\*</sup>,  
Alessandro Molle<sup>1\*</sup>

<sup>1</sup> CNR-IMM Agrate Brianza Unit, via C. Olivetti 2, Agrate Brianza, I-20864, Italy

\*Corresponding authors: [carlo.grazianetti@mdm.imm.cnr.it](mailto:carlo.grazianetti@mdm.imm.cnr.it), [alessandro.molle@mdm.imm.cnr.it](mailto:alessandro.molle@mdm.imm.cnr.it)

**KEYWORDS:** Silicene, Solid Phase Crystallization, Molecular Beam Epitaxy, 2D Materials

S11: Auger Spectra

S12: LEED Patterns below 1 Monolayer

S13: Methodology for Nominal Thickness

S14: Region of Interest with Si Pixels Merger

S15: Raman Analysis of Region of Interest

## SI1: Auger Spectra of sample after 400 °C Annealing

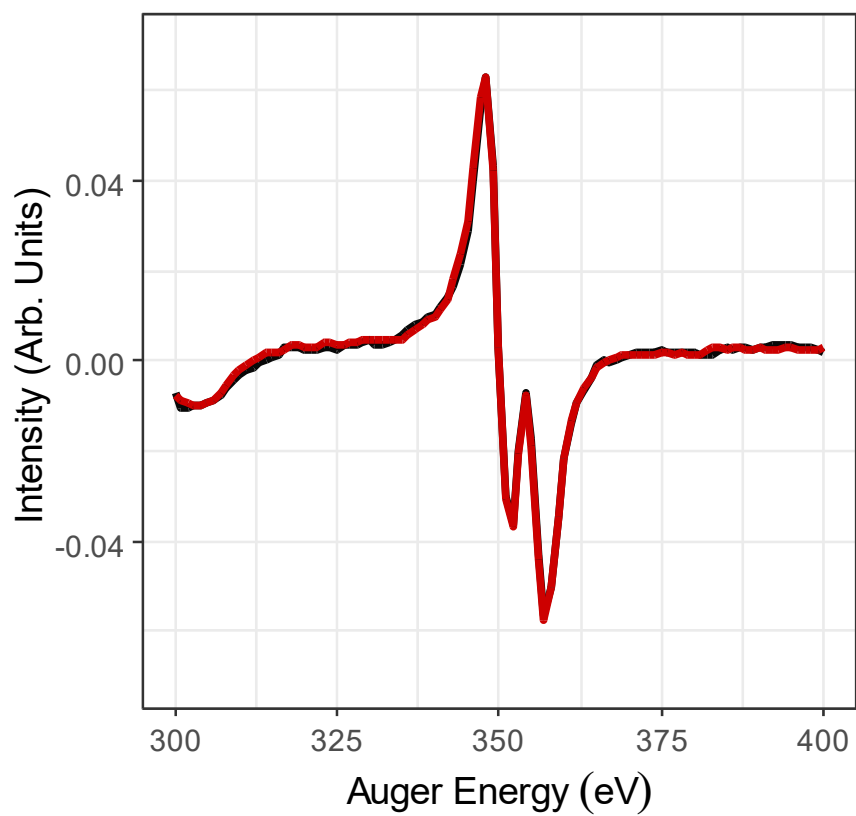

**Figure S1:** Auger spectra acquired on two different surfaces: (i) black before depositing Si (ref. main text **figure 1a**) and (ii) red after annealing deposited Si at 400 °C (main text **figure 1f**).

## SI2: LEED Patterns below 1 Monolayer

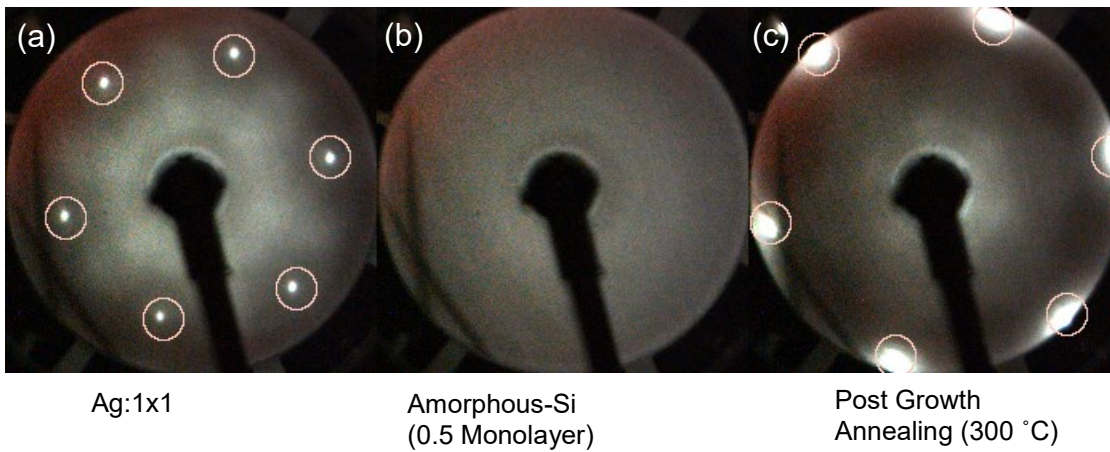

**Figure S2:** (a) Ag:1x1 surface post to preparation. (b) Amorphous-Si after depositing 0.5 monolayer of Si on Ag(111). (c) LEED patterns observed after heating surface in (b) at 300 °C for 15 minutes. Incident LEED Energies ( $E_i$ ) for (a), (b) and (c) respectively are 90, 50 and 50 eV.

### SI3: Methodology for Nominal Thickness

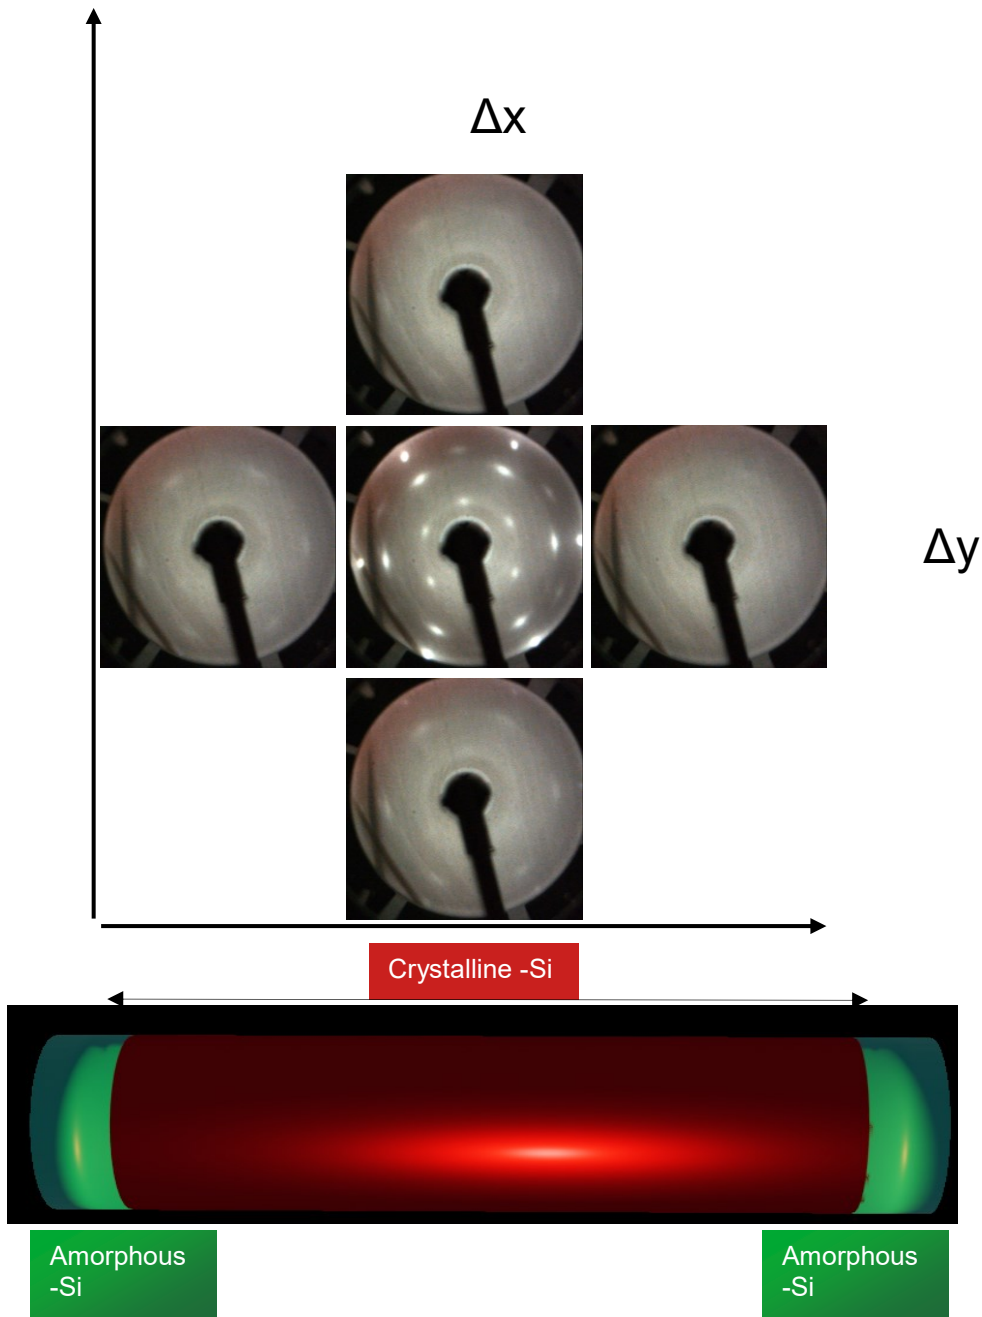

**Figure S3:** Methodology to determine nominal crystalline length with the help of manipulator. The manipulator is moved along in one axis at a time, either x or y (z is perpendicular to the sample surface) until amorphous region (green) appears at the end. This gives the crystalline length.

## SI4: Region of Interest with Si-Pixels Merger

Region of Interest (ROI):  
Merger of several 2D crystalline-Si pixels

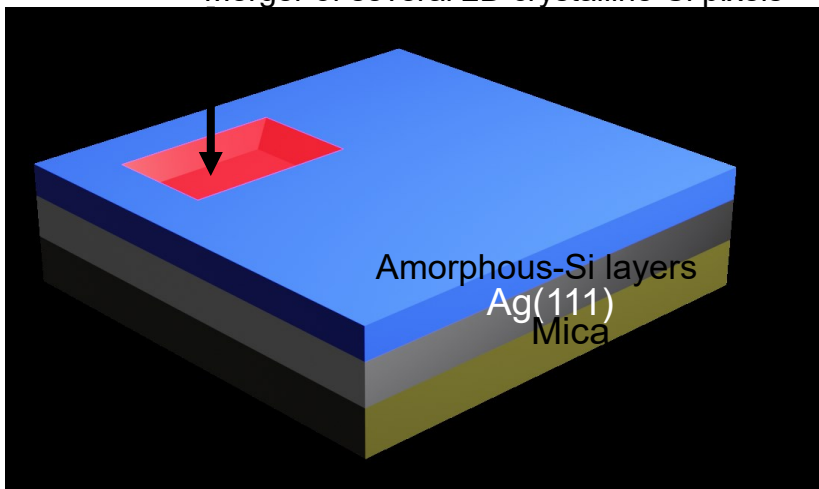

**Figure S4:** 3D sketch of Region of Interest (ROI) that was created on Amorphous-Si layers

## SI5: Raman Analysis of Region of Interest

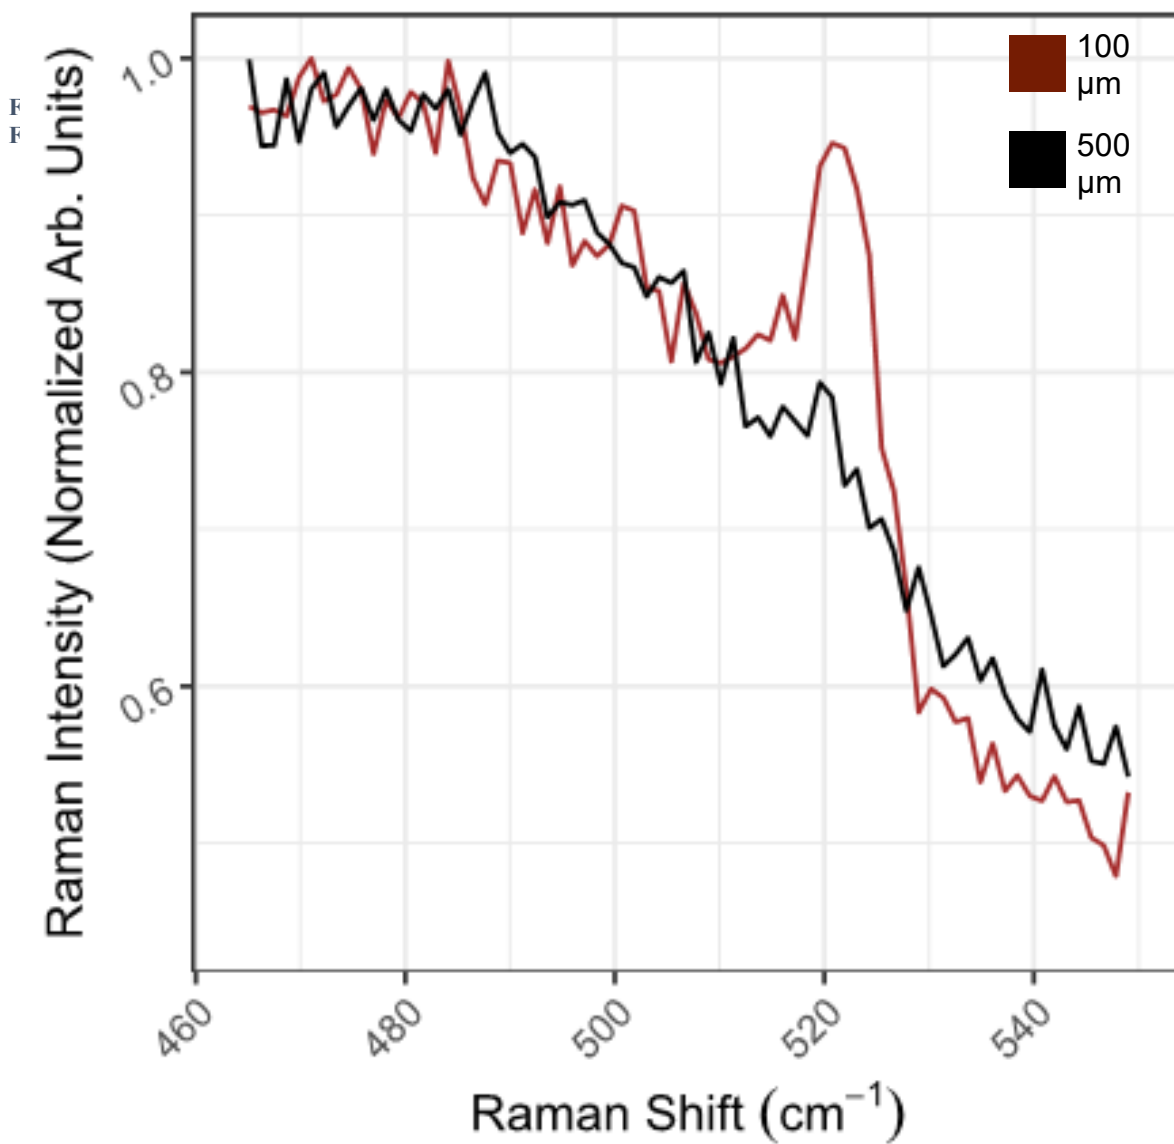

Figure S5a: Raman measurements while moving towards amorphous-Si side from crystalline-Si side.

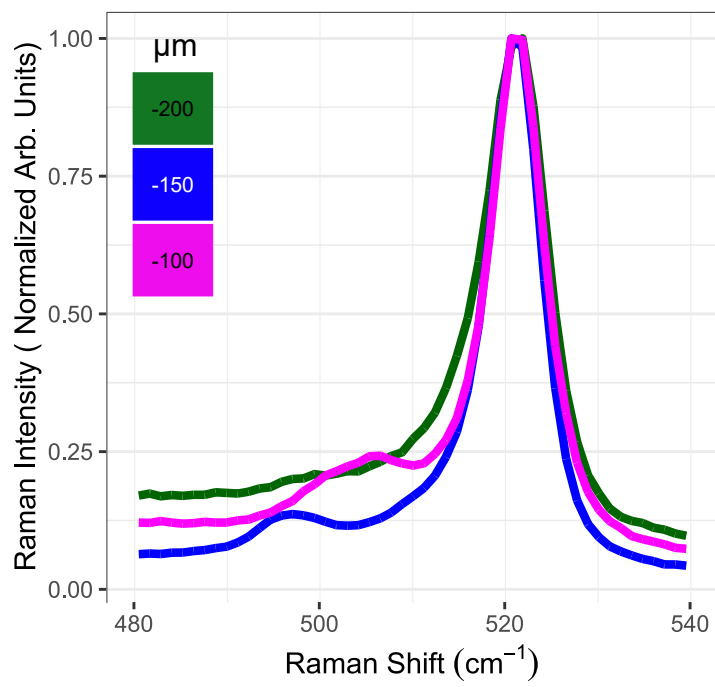

**Figure S5b:** Raman spectra at different positions between crystalline and amorphous-Si interface at Region of interest (figure S4). (D=-50 μm; purple), (D=-100 μm; orange), (D=-150 μm; magenta) and (D=-200 μm; black). Crf: **Figure 5** (main text)

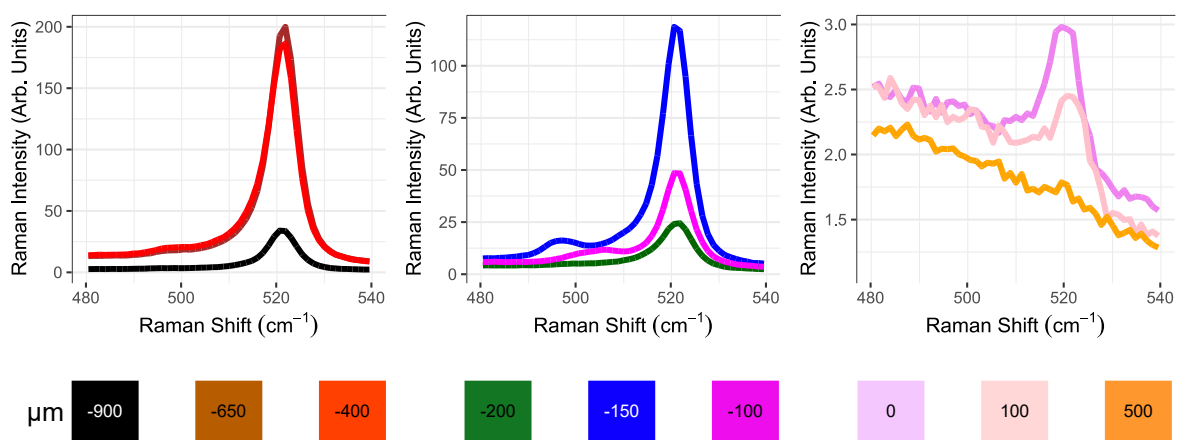

**Figure S5c:** As acquired Raman spectra along a scan while moving from crystalline (left) to amorphous region (right) at Region of Interest (figure S4). Cfr. Figure 5 (main text).
